# Supplementary material
Source: Research Square preprint supplement (doi:10.21203/rs.3.rs-9714444/v1)
Supplement: Supplementary file 1 [file 9af1ab393840ebd7ccc47c7b.pdf]

Panels A, B, and C represent the Western blot analysis shown in Fig 1

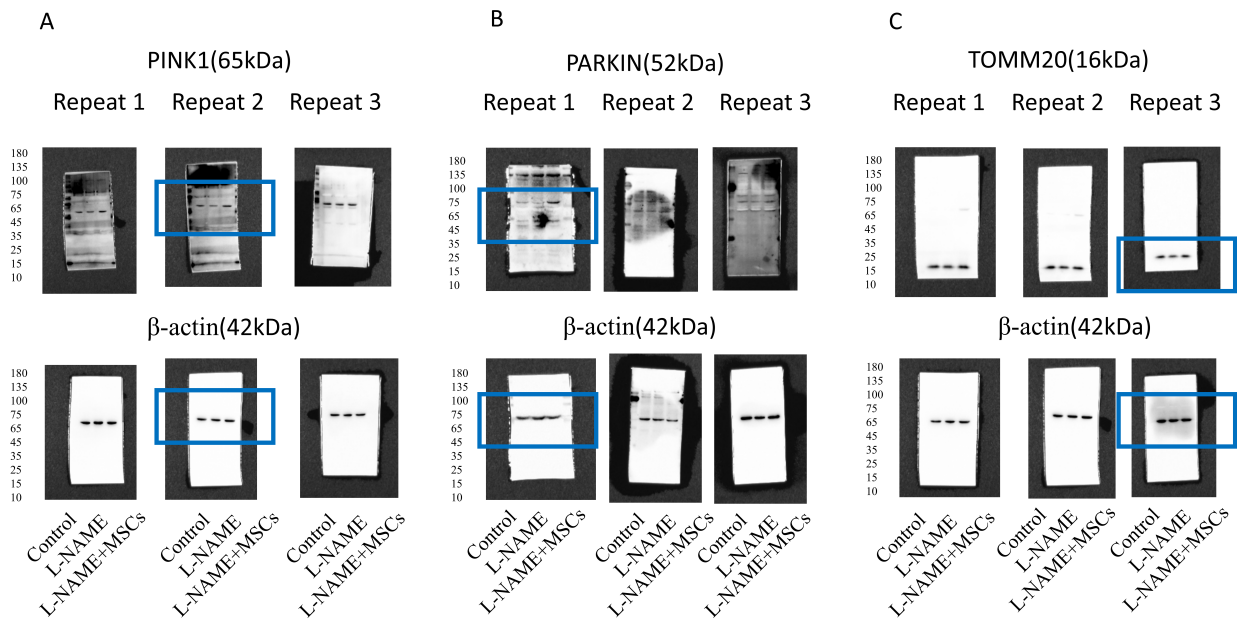

The blue boxes are used for the figure panels.

Panels A, B, and C represent the Western blot analysis shown in Fig 3A

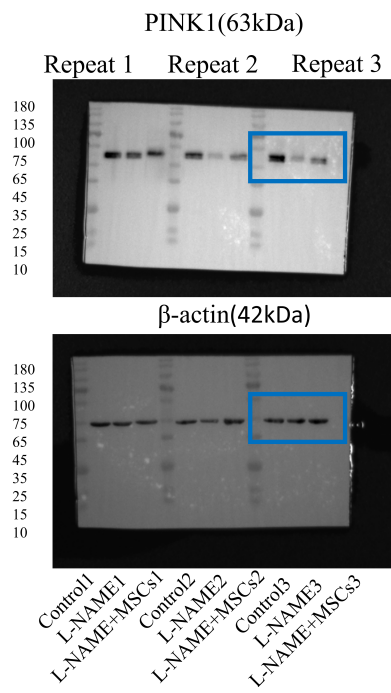

The blue boxes are used for the figure panels.

Panels A, B, and C represent the Western blot analysis shown in Fig 3A

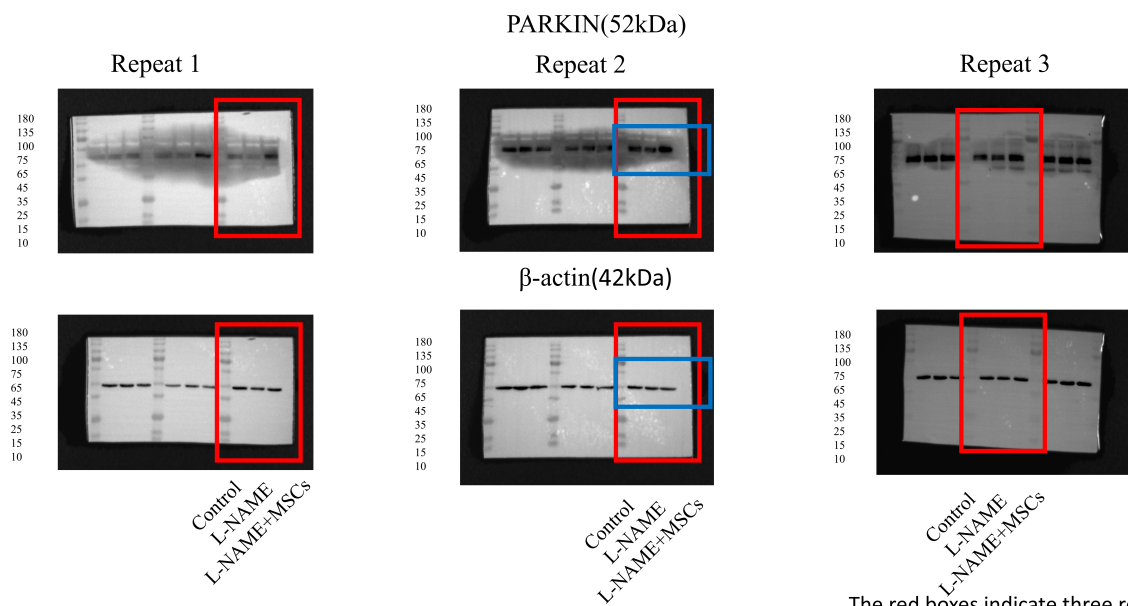

The red boxes indicate three repetitions, and the blue boxes are used for the figure panels.

Panels A, B, and C represent the Western blot analysis shown in Fig 3A

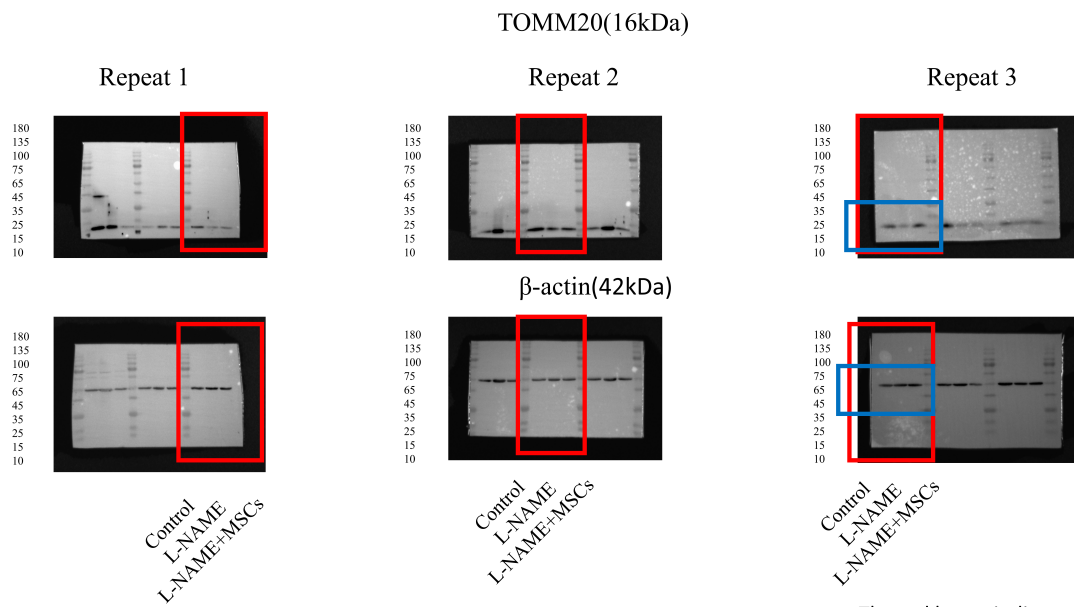

The red boxes indicate three repetitions, and the blue boxes are used for the figure panels.
